# Supplementary material for: Genetic Association Studies in Lumbar Disc Degeneration: A Systematic Review
Source: PubMed Central journal article supplement (PMC3503778; doi:10.1371/journal.pone.0049995), 2012-11-21
Supplement: pone.0049995.s002.pdf [file pone.0049995.s002.pdf]

# GENETIC ASSOCIATION STUDIES IN LUMBAR DISC DEGENERATION

## A SYSTEMATIC REVIEW

### SUPPORTING INFORMATION

#### APPENDIX S1

Pasi J Eskola, Susanna Lemmelä, Per Kjaer, Svetlana Solovieva, Minna Männikkö, Niels Tommerup, Allan Lind-Thomsen, Kirsti Husgafvel-Pursiainen, Kenneth MC Cheung, Danny Chan, Dino Samartzis and Jaro Karppinen.

|                                                                                    |           |
|------------------------------------------------------------------------------------|-----------|
| <b>Supporting Method Information</b> .....                                         | <b>2</b>  |
| <i>Study inclusion criteria</i> .....                                              | 2         |
| <i>Study quality assessment essentials</i> .....                                   | 3         |
| <i>Data extraction form (including formalized summary scoring)</i> .....           | 5         |
| <i>Categories for the credibility of cumulative epidemiological evidence</i> ..... | 9         |
| <i>Protein-protein interaction network analysis methods</i> .....                  | 10        |
| <b>Supporting Results Information</b> .....                                        | <b>11</b> |
| <i>Equivalent rs-numbers</i> .....                                                 | 11        |
| <i>Included studies</i> .....                                                      | 12        |
| <i>Excluded studies</i> .....                                                      | 16        |
| <b>References</b> .....                                                            | <b>23</b> |

## **Supporting Method Information**

### **Study inclusion criteria**

Studies that are considered eligible to be included in the review have the following features:

- Relevant outcome or disease
  - o Intervertebral disc changes
  - o Vertebral endplate changes
  - o Spondylarthrosis
- Reliable definition of outcome (MRI)
- Number of study subjects 50 or higher
- Human study
- Specific genetic variant is described

Studies considered not eligible and are therefore excluded from the review have one or more of the following features:

- Outcome or disease is not relevant
- Definition of outcome is not reliable (i.e. is other than MRI)
- Number of study subjects is under 50
- No specific genetic variant is described
- Animal study

## Study quality assessment essentials

| Type of bias     | Criteria                                                                                                                                                                                                                                                                                                                                                                                                                                                                                                                                                                                                                              | Classification                                                                                                                                                                                                                                                                                                                                                                                                                                                                                                                                                                                                                                                                                                                                                                                                                                                                                                                                                                                                                                                                                                                                                   |
|------------------|---------------------------------------------------------------------------------------------------------------------------------------------------------------------------------------------------------------------------------------------------------------------------------------------------------------------------------------------------------------------------------------------------------------------------------------------------------------------------------------------------------------------------------------------------------------------------------------------------------------------------------------|------------------------------------------------------------------------------------------------------------------------------------------------------------------------------------------------------------------------------------------------------------------------------------------------------------------------------------------------------------------------------------------------------------------------------------------------------------------------------------------------------------------------------------------------------------------------------------------------------------------------------------------------------------------------------------------------------------------------------------------------------------------------------------------------------------------------------------------------------------------------------------------------------------------------------------------------------------------------------------------------------------------------------------------------------------------------------------------------------------------------------------------------------------------|
| Selection bias   | <p><i>Major</i></p> <ol style="list-style-type: none"> <li>1. Selection of study population (inclusion and exclusion criteria well specified)</li> <li>2. Representativeness (response rate, difference between participants and non-participants, and control for variables in case difference found between participants and non-participants)</li> <li>3. Population stratification (confounding by ethnic origin)</li> </ol> <p><i>Minor</i></p> <ol style="list-style-type: none"> <li>1. Awareness of study hypothesis</li> <li>2. Possibility of change in the status of a risk factor as a result of low back pain</li> </ol> | <p><i>No or minor:</i> Defined target population represents the general population or subgroup of the general population (e.g. women or men, certain age group, geographical area, certain occupational group) and response rate is above 60%. Ethnic origin is known. Control population is well defined and is similar to affected individuals while unaffected.</p> <p><i>Moderate:</i> Defined target population represents a narrow subgroup of the general population and response rate is 80 -100%. Selection process or proper characteristics of control population are not reported.</p> <p><i>Severe:</i> Defined target population represents a narrow subgroup of the general population and response rate is 60 - 80%. Control population differs from affected individuals or no information of controls is available.</p> <p><i>Definite:</i> Ethnic origin of the population is not known. Study population consists of "self-selected" volunteers if suspicion of payment to non-patients. Control population is of different ethnic origin, nationality or from great geographical distance. Controls have other pathological phenotypes.</p> |
| Performance bias | <p><i>Major</i></p> <ol style="list-style-type: none"> <li>1. Validity genetic analyses method</li> <li>2. Quality control (genotyping error)</li> </ol> <p><i>Minor</i></p> <ol style="list-style-type: none"> <li>1. Blinding of genetic analyses method towards the outcome</li> </ol>                                                                                                                                                                                                                                                                                                                                             | <p><i>No:</i> Validated method, quality control, blinding of assessors of exposure towards the outcome.</p> <p><i>Minor:</i> Blinding not reported.</p> <p><i>Moderate:</i> Validated method, no quality control.</p> <p><i>Definite:</i> Non-validated genetic analyses method, no quality control, genotyping was not blinded towards the outcome.</p>                                                                                                                                                                                                                                                                                                                                                                                                                                                                                                                                                                                                                                                                                                                                                                                                         |

| Type of bias         | Criteria                                                                                                                                                                                                                                                                                                                                            | Classification                                                                                                                                                                                                                                                                                                                                                                                                                                                                                                          |
|----------------------|-----------------------------------------------------------------------------------------------------------------------------------------------------------------------------------------------------------------------------------------------------------------------------------------------------------------------------------------------------|-------------------------------------------------------------------------------------------------------------------------------------------------------------------------------------------------------------------------------------------------------------------------------------------------------------------------------------------------------------------------------------------------------------------------------------------------------------------------------------------------------------------------|
| Detection bias       | <p><i>Major</i></p> <ol style="list-style-type: none"> <li>1. Clear definition of outcome</li> <li>2. Standardized validated method of assessing outcome</li> </ol> <p><i>Minor</i></p> <ol style="list-style-type: none"> <li>1. Blinding of assessors of outcome towards genetic factors</li> </ol>                                               | <p><i>No or minor:</i> Clear definition of outcome and standardized method of assessing outcome.</p> <p><i>Moderate:</i> Clear definition of outcome and not standardized method of assessing outcome.</p> <p><i>Definite:</i> Unclear definition of outcome or non-systematic assessment of outcome.</p>                                                                                                                                                                                                               |
| Attrition bias       | <p><i>Major</i></p> <ol style="list-style-type: none"> <li>1. Magnitude of missing data (including unsuccessful genotyping)</li> <li>2. Completeness of follow-up (if applicable)</li> </ol> <p>Where the magnitude of missing data is not reported, studies are to be considered having <i>Possible</i> attrition bias.</p>                        | <p><i>No:</i> Less than 20% of missing data. Participation rate 50-100% for follow-up time &lt; 5 years, or comparison done for lost to follow-up regarding variables of interest.</p> <p><i>Possible:</i> Missing data between 20% and 40%. Participation rate 30-50% for follow-up time &lt; 5 years, and no comparison done for lost to follow-up regarding variables of interest and</p> <p><i>Definite:</i> More than 40% of missing data. Participation rate less than 30% for follow-up time &lt; 5 years or</p> |
| Statistical analyses | <ol style="list-style-type: none"> <li>1. Population stratification has been addressed</li> <li>2. Hardy-Weinberg equilibrium was considered</li> <li>3. Methods used for inferring genotypes and haplotypes are specified and valid</li> <li>4. Multiple comparison has been addressed / risk of false positive findings was controlled</li> </ol> | <p>Each item should be responded as no/yes/unclear</p>                                                                                                                                                                                                                                                                                                                                                                                                                                                                  |

**Data extraction form (including formalized summary scoring)**

| Data Extraction Form                             |                                                                                                                                                                                           | DD and Genes – A Systematic Review                                                                                                                                                                                                                                                                                      |
|--------------------------------------------------|-------------------------------------------------------------------------------------------------------------------------------------------------------------------------------------------|-------------------------------------------------------------------------------------------------------------------------------------------------------------------------------------------------------------------------------------------------------------------------------------------------------------------------|
| <b>STUDY DETAILS</b>                             |                                                                                                                                                                                           |                                                                                                                                                                                                                                                                                                                         |
| Title (ID)                                       |                                                                                                                                                                                           | Scoring (max. 31 points)                                                                                                                                                                                                                                                                                                |
| First author, year of publication                |                                                                                                                                                                                           |                                                                                                                                                                                                                                                                                                                         |
| Year(s) of study                                 |                                                                                                                                                                                           | 1 point <input type="checkbox"/> if reported, not the year of publication                                                                                                                                                                                                                                               |
| Country of study                                 |                                                                                                                                                                                           |                                                                                                                                                                                                                                                                                                                         |
| Study design                                     |                                                                                                                                                                                           |                                                                                                                                                                                                                                                                                                                         |
| Sponsorship of study                             |                                                                                                                                                                                           |                                                                                                                                                                                                                                                                                                                         |
| <b>POPULATION</b>                                |                                                                                                                                                                                           |                                                                                                                                                                                                                                                                                                                         |
| Subjects                                         | Clinical <input type="checkbox"/> General <input type="checkbox"/> Working <input type="checkbox"/><br><input type="checkbox"/> Teenage <input type="checkbox"/>                          | 1 point <input type="checkbox"/> if reported                                                                                                                                                                                                                                                                            |
| Symptoms (if reported)                           | LBP <input type="checkbox"/> Sciatica <input type="checkbox"/><br>Asymptomatic <input type="checkbox"/><br>Other; what: _____ Not reported <input type="checkbox"/>                       |                                                                                                                                                                                                                                                                                                                         |
| N of individuals in total                        | N= _____                                                                                                                                                                                  | 1 point <input type="checkbox"/> if reported and more than 100 individuals<br>2 points <input type="checkbox"/> if reported and more than 300 individuals<br>3 points <input type="checkbox"/> if reported and more than 600 individuals<br>4 points <input type="checkbox"/> if reported and more than 900 individuals |
| N of cases                                       | $N_{\text{case}} =$ _____                                                                                                                                                                 |                                                                                                                                                                                                                                                                                                                         |
| N of controls                                    | $N_{\text{cont}} =$ _____                                                                                                                                                                 |                                                                                                                                                                                                                                                                                                                         |
| Gender in total population                       | F (%)= _____ M (%)= _____                                                                                                                                                                 | 1 point <input type="checkbox"/> if reported in all subgroups / properly, or if age and sex matched controls                                                                                                                                                                                                            |
| Gender in cases (fill in the reported gender)    | $F_{\text{case}} (\%) =$ _____ $M_{\text{case}} (\%) =$ _____                                                                                                                             |                                                                                                                                                                                                                                                                                                                         |
| Gender in controls (fill in the reported gender) | $F_{\text{cont}} (\%) =$ _____ $M_{\text{cont}} (\%) =$ _____                                                                                                                             |                                                                                                                                                                                                                                                                                                                         |
| Age (fill in what is reported)                   | Age range = _____ Mean age and SD= _____                                                                                                                                                  |                                                                                                                                                                                                                                                                                                                         |
| Age in cases                                     | Age range <sub>case</sub> = _____ Mean age and SD <sub>case</sub> = _____                                                                                                                 | 1 point <input type="checkbox"/> if reported in all subgroups (population study=only one subgroup)                                                                                                                                                                                                                      |
| Age in controls                                  | Age range <sub>cont</sub> = _____ Mean age and SD <sub>cont</sub> = _____                                                                                                                 |                                                                                                                                                                                                                                                                                                                         |
| Ethnicity                                        | Caucasian <input type="checkbox"/> Asian <input type="checkbox"/> American <input type="checkbox"/><br><input type="checkbox"/> African <input type="checkbox"/><br>Other, specify: _____ | 1 point <input type="checkbox"/> if reported                                                                                                                                                                                                                                                                            |

**PHENOTYPES**

**MRI**

|                                                                                                         |                                                                                                                                                                                                                                                                                                                                                                                                                                                                                                                                                                                                                                                                                                                                                                            |                                                                                         |
|---------------------------------------------------------------------------------------------------------|----------------------------------------------------------------------------------------------------------------------------------------------------------------------------------------------------------------------------------------------------------------------------------------------------------------------------------------------------------------------------------------------------------------------------------------------------------------------------------------------------------------------------------------------------------------------------------------------------------------------------------------------------------------------------------------------------------------------------------------------------------------------------|-----------------------------------------------------------------------------------------|
| Field strength (Tesla)                                                                                  | Field strength <input type="checkbox"/> Not reported <input type="checkbox"/>                                                                                                                                                                                                                                                                                                                                                                                                                                                                                                                                                                                                                                                                                              | 1 point <input type="checkbox"/> if reported                                            |
| T1/T2 /PD                                                                                               | Not reported <input type="checkbox"/>                                                                                                                                                                                                                                                                                                                                                                                                                                                                                                                                                                                                                                                                                                                                      |                                                                                         |
| Slice orientation                                                                                       | Sagittal <input type="checkbox"/> Axial <input type="checkbox"/> Coronal <input type="checkbox"/><br>Multi-slice <input type="checkbox"/> Other <input type="checkbox"/> Not reported <input type="checkbox"/>                                                                                                                                                                                                                                                                                                                                                                                                                                                                                                                                                             |                                                                                         |
| Lumbar disk levels imaged                                                                               | L1/L2 <input type="checkbox"/> L2/L3 <input type="checkbox"/> L3/L4 <input type="checkbox"/><br>L4/L5 <input type="checkbox"/> L5/S1 <input type="checkbox"/> Not specified <input type="checkbox"/>                                                                                                                                                                                                                                                                                                                                                                                                                                                                                                                                                                       | 1 point <input type="checkbox"/> if all lumbar levels                                   |
| Other disk levels                                                                                       |                                                                                                                                                                                                                                                                                                                                                                                                                                                                                                                                                                                                                                                                                                                                                                            | 1 point <input type="checkbox"/> if other levels analysed separately                    |
| Slice thickness (mm.)                                                                                   | Not reported <input type="checkbox"/>                                                                                                                                                                                                                                                                                                                                                                                                                                                                                                                                                                                                                                                                                                                                      |                                                                                         |
| Other specific technical data on MRI                                                                    | Not reported <input type="checkbox"/>                                                                                                                                                                                                                                                                                                                                                                                                                                                                                                                                                                                                                                                                                                                                      |                                                                                         |
| Number of MRI readers                                                                                   | N=                                                                                                                                                                                                                                                                                                                                                                                                                                                                                                                                                                                                                                                                                                                                                                         |                                                                                         |
| Qualification of reader(s)                                                                              | Specialist= <input type="checkbox"/> Specialist (radiology)= <input type="checkbox"/><br>Specialist(surgery)= <input type="checkbox"/> Researcher= <input type="checkbox"/><br>Student= <input type="checkbox"/> Not reported <input type="checkbox"/><br>Other:                                                                                                                                                                                                                                                                                                                                                                                                                                                                                                           |                                                                                         |
| Reader blinded to genetic data?                                                                         | Yes <input type="checkbox"/> No <input type="checkbox"/> Not reported <input type="checkbox"/>                                                                                                                                                                                                                                                                                                                                                                                                                                                                                                                                                                                                                                                                             | 1 point <input type="checkbox"/> if "Yes"                                               |
| Reproducibility tested?                                                                                 | Yes <input type="checkbox"/> No <input type="checkbox"/> Not reported <input type="checkbox"/>                                                                                                                                                                                                                                                                                                                                                                                                                                                                                                                                                                                                                                                                             | 1 point <input type="checkbox"/> if "Yes"                                               |
| Intra/inter-tester                                                                                      | Intra <input type="checkbox"/> Inter <input type="checkbox"/> Not reported <input type="checkbox"/>                                                                                                                                                                                                                                                                                                                                                                                                                                                                                                                                                                                                                                                                        |                                                                                         |
| Results of reproducibility test (methods, results: Kappa, ICC or percentage; i.e. results written open) |                                                                                                                                                                                                                                                                                                                                                                                                                                                                                                                                                                                                                                                                                                                                                                            |                                                                                         |
| Degeneration defined by (mark all that fit)                                                             | Disk space narrowing / Disk height reduction <input type="checkbox"/><br>Signal intensity loss <input type="checkbox"/><br>Presence of fissures (AT) <input type="checkbox"/><br>HIZ lesions <input type="checkbox"/><br>Bulging <input type="checkbox"/><br>Protrusion <input type="checkbox"/><br>Ligamentous signal changes <input type="checkbox"/><br>Endplate signal changes <input type="checkbox"/><br>Osteophytosis <input type="checkbox"/><br><br>Vertebral malalignment <input type="checkbox"/><br>Foraminal stenosis <input type="checkbox"/><br>Central canal stenosis <input type="checkbox"/><br>Nerve root displacement <input type="checkbox"/><br>Swelling <input type="checkbox"/><br>Dura impression / spinal cord affected <input type="checkbox"/> |                                                                                         |
| Standardized definition of degeneration                                                                 | Reference                                                                                                                                                                                                                                                                                                                                                                                                                                                                                                                                                                                                                                                                                                                                                                  | 2 points <input type="checkbox"/> if reported and definition is well established before |

**GENOTYPES AND OTHER EXPOSURES**

Genotyping methods  
 Blinding of researchers in genotyping (to degeneration data) No  Yes  Not reported   
 Genes  
 Polymorphisms  
     rs numbers (if reported)  
 Other exposures (e.g. smoking, BMI, height, physical workload)

(Report number if multiple variations)  
 (Report number if multiple variations)

**QUALITY ASSESSMENT**

Selection bias No or Minor  Moderate  Severe  Definite   
 Performance bias No  Minor  Moderate  Definite   
 Detection bias No or Minor  Moderate  Definite   
 Attrition bias No  Possible  Definite   
 Statistical analyses  
 Population stratification Adequate  Poor  Unclear   
 HWE considered Adequate  Poor  Unclear   
 Methods used for inferring genotypes and haplotypes specified and valid Adequate  Poor  Unclear   
 Multiple comparison has been addressed / risk of false positive findings was controlled Adequate  Poor  Unclear   
 Other exposure issue considered in analyses No  Yes  Not reported

(3-0 points) 3 if No or Minor, 2 Moderate, 1 Severe, 0 Definite  
 (2-0 points) 3 = "No", 2="Minor" 1= "Moderate", 0 = "Definite"  
 (2-0 points) 2 = "No or Minor", 1 = "Moderate", 0 = "Definite"  
 (2-0 points) 2 = "No", 1 = "Possible", 0 = "Definite"  
 (1 points each if "Adequate", max. 4 points)  
 1 point  if "Yes"

**FINDINGS**

Phenotype Genotype or haplotype or combined genotypes  
 Genotype (data for cases and controls, as presented in the study)  
 Measures of association (e.g. ORs and 95% CI)  
 Phenotype Genotype (data for cases and controls, as presented in the study)  
 Measures of association (e.g. ORs and 95% CI)

|                               |                                                                                                                                            |
|-------------------------------|--------------------------------------------------------------------------------------------------------------------------------------------|
| Phenotype                     | Genotype (data for cases and controls, as presented in the study)                                                                          |
|                               | Measures of association (e.g. ORs and 95% CI)                                                                                              |
| Phenotype                     | Genotype (data for cases and controls, as presented in the study)                                                                          |
|                               | Measures of association (e.g. ORs and 95% CI)                                                                                              |
| Phenotype                     | Genotype (data for cases and controls, as presented in the study)                                                                          |
| Interactions                  |                                                                                                                                            |
| Interacting phenotypes<br>and | Genotype (data for cases and controls, as presented in the study)                                                                          |
|                               | Measures of association (e.g. ORs and 95% CI)                                                                                              |
| <b>SOURCE OF DATA</b>         | Publication <input type="checkbox"/> Online database <input type="checkbox"/><br>From correspondence with authors <input type="checkbox"/> |



Categories for the credibility of cumulative epidemiological evidence

|     |     |     |
|-----|-----|-----|
| AAA | ABA | ACA |
| AAB | ABB | ACB |
| AAC | ABC | ACC |

First letter = amount  
 Second letter = replication  
 Third letter = protection from bias

|     |     |     |
|-----|-----|-----|
| BAA | BBA | BCA |
| BAB | BBB | BCB |
| BAC | BBC | BCC |

 Strong evidence  
 Moderate evidence  
 Weak evidence

|     |     |     |
|-----|-----|-----|
| CAA | CBA | CCA |
| CAB | CBB | CCB |
| CAC | CBC | CCC |

**Figure S1** Categories for the credibility of cumulative epidemiological evidence. The three letters correspond (in order) to amount of evidence, replication and protection from bias. Evidence is categorized as strong, when there is A for all three items, and is categorized as weak when there is a C for any of the three items. All other combinations are categorized as moderate. From Ioannidis JP *et al.*<sup>1</sup> with permission from Oxford University Press.

## **Protein-protein interaction network analysis methods**

The PPI-network was created with InWeb 2.0<sup>2</sup> using all genes with a positive association to lumbar disc degeneration as input.

InWeb is based on mining of online interactiondatabases String<sup>3</sup>, MINT<sup>4</sup>, Bind<sup>5</sup>, DIP<sup>6</sup>, GRID<sup>7</sup>, HPRD<sup>8</sup>, Kegg<sup>9</sup>, Reactome<sup>10</sup> and IntAct<sup>11</sup>. All experimentally based interactions from each was kept and given a score between 0 and 1<sup>2</sup>. We used all interactions with a score on 0.5 or higher. To avoid highly interacting proteins (hubs) we used a network score on 0.1, which means all linker-protein (protein not in input) at most is allowed to interact with 9 other linker-proteins for each input protein they interact with<sup>2</sup>. P-values was calculated creating 10.000 random networks.

## Supporting Results Information

### Equivalent rs-numbers

| Gene           | Variation*          | Abbreviation in the study             | rs-number              | Reference for the rs-number         |
|----------------|---------------------|---------------------------------------|------------------------|-------------------------------------|
| <i>COL9A2</i>  | c.976C>T            | Trp2                                  | rs137853213            | Ensembl 64:<br>Sep 2011             |
| <i>COL9A3</i>  | c.307C>T            | Trp3                                  | rs61734651             | Ensembl 64:<br>Sep 2011             |
| <i>COL11A2</i> | c.877-4A>T<br>-     | IVS6 <sup>-4</sup> a/t<br>G>A intron9 | rs1799907<br>rs2744507 | Ensembl 64:<br>Sep 2011             |
| <i>FAS</i>     | -                   | -1377GA                               | rs2234767              | Hu<br>et al 2008 <sup>19</sup>      |
| <i>FASLG</i>   | -                   | -844CT                                | rs763110               | Hu<br>et al 2008 <sup>19</sup>      |
| <i>IL1A</i>    | c.1-889C>T          | IL-1aT <sup>889</sup>                 | rs1800587              | Ensembl 64:<br>Sep 2011             |
| <i>IL1B</i>    | c.3954C>T           | IL-1bT <sup>3954</sup>                | rs1143634              | Ensembl 64:<br>Sep 2011             |
| <i>IL10</i>    | -<br>-              | -1082A/G<br>-592A/C                   | rs1800896<br>rs1800872 | Pereira<br>et al 2008 <sup>13</sup> |
| <i>MMP1</i>    | -                   | -1607                                 | rs1799750              | Ju<br>et al 2005 <sup>14</sup>      |
| <i>MMP2</i>    | -                   | -1306C/T                              | rs243865               | Zhai<br>et al 2007 <sup>15</sup>    |
| <i>MMP3</i>    | c.1-1171insA        | 5'UTR -1171a                          | rs3025058              | Tsironi<br>et al 2009 <sup>17</sup> |
| <i>MMP9</i>    | -                   | -1562C/T                              | rs3918242              | Demacq<br>et al 2009 <sup>16</sup>  |
| <i>NOS2</i>    | -                   | exon22 G>A                            | rs1060826              | Ensembl 64:<br>Sep 2011             |
| <i>NOS3</i>    | -                   | -786T/C                               | rs2070744              | Demacq<br>et al 2010 <sup>18</sup>  |
| <i>VDR</i>     | c.2T>C<br>c.1056T>C | FokI<br>TaqI                          | rs2228570<br>rs731236  | Ensembl 64:<br>Sep 2011             |

\* According to den Dunnen JT, Antonarakis SE. Mutation nomenclature extensions and suggestions to describe complex mutations: A discussion<sup>12</sup>

## **Included studies**

### Studies included in the systematic review, total 52

- Annunen S, Paassilta P, Lohiniva J, Perala M, Pihlajamaa T, Karppinen J, Tervonen O, Kroger H, Lahde S, Vanharanta H, et al. 1999. An allele of COL9A2 associated with intervertebral disc disease. *Science* 285(5426):409-12.
- Bei T, Tilkeridis C, Garantziotis S, Boikos S, Kazakos K, Simopoulos C, Stratakis C. 2008. A novel, non-functional, COL1A1 polymorphism is not associated with lumbar disk disease in young male Greek subjects unlike that of the Sp1 site. *Hormones (Athens)* 7(3):251-4.
- Cheung KMC, Chan D, Karppinen J, Chen Y, Jim JJT, Yip S, Ott J, Wong KK, Sham P, Luk KDK, et al. 2006. Association of the taq I allele in vitamin D receptor with degenerative disc disease and disc bulge in a Chinese population. *Spine (Phila Pa 1976)* 31(10):1143-8.
- Cong L, Pang H, Xuan D, Tu GJ. 2010a. Association between the expression of aggrecan and the distribution of aggrecan gene variable number of tandem repeats with symptomatic lumbar disc herniation in Chinese Han of northern China. *Spine (Phila Pa 1976)* 35(14):1371-6.
- Cong L, Pang H, Xuan D, Tu G. 2010b. The interaction between aggrecan gene VNTR polymorphism and cigarette smoking in predicting incident symptomatic intervertebral disc degeneration. *Connect Tissue Res* 51(5):397-403.
- Dong DM, Yao M, Liu B, Sun CY, Jiang YQ, Wang YS. 2007. Association between the -1306C/T polymorphism of matrix metalloproteinase-2 gene and lumbar disc disease in Chinese young adults. *Eur Spine J* 16(11):1958-61.
- Eser B, Cora T, Eser O, Kalkan E, Haktanir A, Erdogan MO, Solak M. 2010. Association of the polymorphisms of vitamin D receptor and aggrecan genes with degenerative disc disease. *Genet Test Mol Biomarkers* 14(3):313-7.
- Eser O, Eser B, Cosar M, Erdogan MO, Aslan A, Yıldız H, Solak M, Haktanır A. 2011. Short aggrecan gene repetitive alleles associated with lumbar degenerative disc disease in Turkish patients. *Genet Mol Res* 10(3):1923-30.
- Eskola PJ, Kjaer P, Daavittila IM, Solovieva S, Okuloff A, Sorensen JS, Wedderkopp N, Ala-Kokko L, Mannikko M, Karppinen JI. 2010. Genetic risk factors of disc degeneration among 12-14-year-old Danish children: A population study *Int J Mol Epidemiol Genet* 1(2):158-65.
- Higashino K, Matsui Y, Yagi S, Takata Y, Goto T, Sakai T, Katoh S, Yasui N. 2007. The alpha2 type IX collagen tryptophan polymorphism is associated with the severity of disc degeneration in younger patients with herniated nucleus pulposus of the lumbar spine. *Int Orthop* 31(1):107-11.
- Hirose Y, Chiba K, Karasugi T, Nakajima M, Kawaguchi Y, Mikami Y, Furuichi T, Mio F, Miyake A, Miyamoto T, et al. 2008. A functional polymorphism in THBS2 that affects alternative splicing and MMP binding is associated with lumbar-disc herniation. *Am J Hum Genet* 82(5):1122-9.
- Jim JJ, Noponen-Hietala N, Cheung KM, Ott J, Karppinen J, Sahraravand A, Luk KD, Yip SP, Sham PC, Song YQ, et al. 2005. The TRP2 allele of COL9A2 is an age-dependent risk factor for the development and severity of intervertebral disc degeneration. *Spine (Phila Pa 1976)* 30(24):2735-42.
- Kales SN, Linos A, Chatzis C, Sai Y, Halla M, Nasioulas G, Christiani DC. 2004. The role of collagen IX tryptophan polymorphisms in symptomatic intervertebral disc disease in southern European patients. *Spine (Phila Pa 1976)* 29(11):1266-70.
- Karasugi T, Semba K, Hirose Y, Kelempisioti A, Nakajima M, Miyake A, Furuichi T, Kawaguchi Y, Mikami Y, Chiba K, et al. 2009. Association of the tag SNPs in the human SKT gene (KIAA1217) with lumbar disc herniation. *J Bone Miner Res* 24(9):1537-43.

- Karppinen J, Solovieva S, Luoma K, Raininko R, Leino-Arjas P, Riihimäki H. 2009. Modic changes and interleukin 1 gene locus polymorphisms in occupational cohort of middle-aged men. *Eur Spine J* 18(12):1963-70.
- Karppinen J, Paakko E, Raina S, Tervonen O, Kurunlahti M, Nieminen P, Ala-Kokko L, Malmivaara A, Vanharanta H. 2002. Magnetic resonance imaging findings in relation to the COL9A2 tryptophan allele among patients with sciatica. *Spine (Phila Pa 1976)* 27(1):78-83.
- Karppinen J, Paakko E, Paassilta P, Lohiniva J, Kurunlahti M, Tervonen O, Nieminen P, Goring HHH, Malmivaara A, Vanharanta H, et al. 2003. Radiologic phenotypes in lumbar MR imaging for a gene defect in the COL9A3 gene of type IX collagen. *Radiology* 227(1):143-8.
- Karppinen J, Daavittila I, Solovieva S, Kuisma M, Taimela S, Natri A, Haapea M, Korpelainen R, Niinimäki J, Tervonen O, et al. 2008. Genetic factors are associated with modic changes in endplates of lumbar vertebral bodies. *Spine (Phila Pa 1976)* 33(11):1236-41.
- Kawaguchi Y, Osada R, Kanamori M, Ishihara H, Ohmori K, Matsui H, Kimura T. 1999. Association between an aggrecan gene polymorphism and lumbar disc degeneration. *Spine (Phila Pa 1976)* 24(23):2456-60.
- Kawaguchi Y, Kanamori M, Ishihara H, Ohmori K, Matsui H, Kimura T. 2002. The association of lumbar disc disease with vitamin-D receptor gene polymorphism. *J Bone Joint Surg Am* 84-A(11):2022-8.
- Kelempisioti A, Eskola P et al. 2011. Genetic susceptibility of intervertebral disc degeneration among young Finnish adults. *BMC Med Genet* 12(1):153.
- Kim D, Lee S, Kim K, Yu S. 2010. Association of interleukin-1 receptor antagonist gene polymorphism with response to conservative treatment of lumbar herniated nucleus pulposus. *Spine (Phila Pa 1976)* 35(16):1527-31.
- Kim NK, Shin DA, Han IB, Yoo EH, Kim SH, Chung SS. 2011. The association of aggrecan gene polymorphism with the risk of intervertebral disc degeneration. *Acta Neurochir* 153(1):129-33.
- Lin WP, Lin JH, Chen XW, Wu CY, Zhang LQ, Huang ZD, Lai JM. 2011. Interleukin-10 promoter polymorphisms associated with susceptibility to lumbar disc degeneration in a Chinese cohort. *Genet Mol Res* 10(3):1719-27.
- Mashayekhi F, Shafiee G, Kazemi M, Dolati P. 2010. Lumbar disk degeneration disease and aggrecan gene polymorphism in northern Iran. *Biochem Genet* 48(7-8):684-9.
- Min SK, Nakazato K, Okada T, Ochi E, Hiranuma K. 2009. The cartilage intermediate layer protein gene is associated with lumbar disc degeneration in collegiate judokas. *Int J Sports Med* 30(9):691-4.
- Min S, Nakazato K, Yamamoto Y, Gushiken K, Fujimoto H, Fujishiro H, Kobayakawa Y, Hiranuma K. 2010. Cartilage intermediate layer protein gene is associated with lumbar disc degeneration in male, but not female, collegiate athletes. *Am J Sports Med* 38(12):2552-7.
- Mio F, Chiba K, Hirose Y, Kawaguchi Y, Mikami Y, Oya T, Mori M, Kamata M, Matsumoto M, Ozaki K, et al. 2007. A functional polymorphism in COL11A1, which encodes the alpha 1 chain of type XI collagen, is associated with susceptibility to lumbar disc herniation. *Am J Hum Genet* 81(6):1271-7.
- Nojonen-Hietala N, Kyllönen E, Mannikko M, Ilkko E, Karppinen J, Ott J, Ala-Kokko L. 2003. Sequence variations in the collagen IX and XI genes are associated with degenerative lumbar spinal stenosis. *Ann Rheum Dis* 62(12):1208-14.
- Nojonen-Hietala N, Virtanen I, Karttunen R, Schwenke S, Jakkula E, Li H, Merikivi R, Barral S, Ott J, Karppinen J, et al. 2005. Genetic variations in IL6 associate with intervertebral disc disease characterized by sciatica. *Pain* 114(1-2):186-94.
- Nunes, F.T.B.b, Conforti-Froes, N.D.T.a b c, Negrelli, W.F.e, Souza, D.R.S.b d. 2007. Genetic and environmental factors involved on intervertebral disc degeneration. *Acta Ortopedica Brasileira* 15(1):9-13.

- Oishi Y, Shimizu K, Katoh T, Nakao H, Yamaura M, Furuko T, Narusawa K, Nakamura T. 2003. Lack of association between lumbar disc degeneration and osteophyte formation in elderly Japanese women with back pain. *Bone* 32(4):405-11.
- Paassilta P, Lohiniva J, Goring HH, Perala M, Raina SS, Karppinen J, Hakala M, Palm T, Kroger H, Kaitila I, et al. 2001. Identification of a novel common genetic risk factor for lumbar disk disease. *JAMA* 285(14):1843-9.
- Paz Aparicio J, López-Anglada Fernández E, Montes Prieto H, Pena Vázquez J, Fernández Bances I, Folgueras Henriksen V, López Fernández P, López-Fanjúl Menéndez JC, Valle Garay E, Asensi Álvarez V. 2010. Association between the genetic polymorphism of interleukin-1 $\beta$  (3953 T/C) and symptomatic lumbar herniated disc. *Revista Espanola De Cirugia Ortopedica y Traumatologia* 54(4):227-33.
- Roughley P, Martens D, Rantakokko J, Alini M, Mwale F, Antoniou J. 2006. The involvement of aggrecan polymorphism in degeneration of human intervertebral disc and articular cartilage. *Eur Cell Mater* 11:1-7.
- Seki S, Kawaguchi Y, Chiba K, Mikami Y, Kizawa H, Oya T, Mio F, Mori M, Miyamoto Y, Masuda I, et al. 2005. A functional SNP in CILP, encoding cartilage intermediate layer protein, is associated with susceptibility to lumbar disc disease. *Nat Genet* 37(6):607-12.
- Seki S, Kawaguchi Y, Mori M, Mio F, Chiba K, Mikami Y, Tsunoda T, Kubo T, Toyama Y, Kimura T, et al. 2006. Association study of COL9A2 with lumbar disc disease in the Japanese population. *J Hum Genet* 51(12):1063-7.
- Solovieva S, Kouhia S, Leino-Arjas P, Ala-Kokko L, Luoma K, Raininko R, Saarela J, Riihimäki H. 2004. Interleukin 1 polymorphisms and intervertebral disc degeneration. *Epidemiology* 15(5):626-33.
- Solovieva S, Lohiniva J, Leino-Arjas P, Raininko R, Luoma K, Ala-Kokko L, Riihimäki H. 2006. Intervertebral disc degeneration in relation to the COL9A3 and the IL-1 gene polymorphisms. *Eur Spine J* 15(5):613-9.
- Solovieva S, Lohiniva J, Leino-Arjas P, Raininko R, Luoma K, Ala-Kokko L, Riihimäki H. 2002. COL9A3 gene polymorphism and obesity in intervertebral disc degeneration of the lumbar spine: Evidence of gene-environment interaction. *Spine (Phila Pa 1976)* 27(23):2691-6.
- Solovieva S, Noponen N, Mannikko M, Leino-Arjas P, Luoma K, Raininko R, Ala-Kokko L, Riihimäki H. 2007. Association between the aggrecan gene variable number of tandem repeats polymorphism and intervertebral disc degeneration. *Spine (Phila Pa 1976)* 32(16):1700-5.
- Song Y, Ho DWH, Karppinen J, Kao PYP, Fan B, Luk KDK, Yip S, Leong JCY, Cheah KSE, Sham P, et al. 2008a. Association between promoter -1607 polymorphism of MMP1 and lumbar disc disease in southern Chinese. *BMC Med Genet* 9:38-.
- Song Y, Cheung KMC, Ho DWH, Poon SCS, Chiba K, Kawaguchi Y, Hirose Y, Alini M, Grad S, Yee AFY, et al. 2008b. Association of the asporin D14 allele with lumbar-disc degeneration in Asians. *Am J Hum Genet* 82(3):744-7.
- Sun ZM, Miao L, Zhang YG, Ming L. 2009. Association between the -1562 C/T polymorphism of matrix metalloproteinase-9 gene and lumbar disc disease in the young adult population in north China. *Connect Tissue Res* 50(3):181-5.
- Sun Z, Ling M, Huo Y, Chang Y, Li Y, Qin H, Yang G, Lucas R. 2011. Caspase 9 gene polymorphism and susceptibility to lumbar disc disease in the Han population in northern China. *Connect Tissue Res* 52(3):198-202.
- Takahashi M, Haro H, Wakabayashi Y, Kawa-uchi T, Komori H, Shinomiya K. 2001. The association of degeneration of the intervertebral disc with 5a/6a polymorphism in the promoter of the human matrix metalloproteinase-3 gene. *J Bone Joint Surg Br* 83(4):491-5.
- Videman T, Leppavuori J, Kaprio J, Battie MC, Gibbons LE, Peltonen L, Koskenvuo M. 1998. Intragenic polymorphisms of the vitamin D receptor gene associated with intervertebral disc degeneration. *Spine (Phila Pa 1976)* 23(23):2477-85.

- Videman T, Gibbons LE, Battie MC, Maravilla K, Vanninen E, Leppavuori J, Kaprio J, Peltonen L. 2001. The relative roles of intragenic polymorphisms of the vitamin d receptor gene in lumbar spine degeneration and bone density. *Spine (Phila Pa 1976)* 26(3):E7-E12.
- Videman T, Saarela J, Kaprio J, Nakki A, Levalahti E, Gill K, Peltonen L, Battie MC. 2009. Associations of 25 structural, degradative, and inflammatory candidate genes with lumbar disc desiccation, bulging, and height narrowing. *Arthritis Rheum* 60(2):470-81.
- Virtanen IM, Song YQ, Cheung KMC, Ala-Kokko L, Karppinen J, Ho DWH, Luk KDK, Yip SP, Leong JCY, Cheah KSE, et al. 2007. Phenotypic and population differences in the association between CILP and lumbar disc disease. *J Med Genet* 44(4):285-8.
- Williams FM, Popham M, Hart DJ, de Schepper E, Bierma-Zeinstra S, Hofman A, Uitterlinden AG, Arden NK, Cooper C, Spector TD, et al. 2011. GDF5 single-nucleotide polymorphism rs143383 is associated with lumbar disc degeneration in northern European women. *Arthritis Rheum* 63(3):708-12.
- Zhu G, Jiang X, Xia C, Sun Y, Zeng Q, Wu X, Li X. 2011. Association of FAS and FAS ligand polymorphisms with the susceptibility and severity of lumbar disc degeneration in Chinese Han population. *Biomarkers* 16(6):485-90. Epub 2011 Aug 1

## **Excluded studies**

Systematic search hits excluded after dual examination of abstracts and/or full text articles, total 72

*-the reason for exclusion*

Genetic predispositions to low back pain. (2005) *Medecine/Sciences* 21(10): 820.

*-review article*

Aladin DMK, Cheung KMC, Chan D, Yee AFY, Jim JJT, Luk KDK & Lu WW (2007) Expression of the Trp2 allele of COL9A2 is associated with alterations in the mechanical properties of human intervertebral discs. *Spine (Phila Pa 1976)* 32(25): 2820-2826.

*-number of study subjects is less than 50*

Aladin DMK, Cheung KMC, Ngan AHW, Chan D, Leung VYL, Lim CT, Luk KDK & Lu WW (2010) Nanostructure of Collagen Fibrils in Human Nucleus Pulposus and Its Correlation with Macroscale Tissue Mechanics. *J Orthop Res* 28(4): 497-502.

*-no genetic variant described*

Ala-Kokko L (2002) Genetic risk factors for lumbar disc disease. *Ann Med* 34(1): 42-7.

*-review article*

Anderson JA, Ng JJ, Bowe C, McDonald C, Richman DP, Wollmann RL & Maselli RA (2008) Variable phenotypes associated with mutations in DOK7. *Muscle Nerve* 37(4): 448-456.

*-not a relevant outcome*

Aulisa L, Papaleo P, Pola E, Angelini F, Aulisa AG, Tamburrelli FC, Pola P & Logroscino CA (2007) Association between IL-6 and MMP-3 gene polymorphisms and adolescent idiopathic scoliosis: A case-control study. *Spine (Phila Pa 1976)* 32(24): 2700-2702.

*-not a relevant outcome*

Battié MC & Videman T (2006) Lumbar disc degeneration: Epidemiology and genetics. *J Bone Joint Surg Am* 88: 3-9.

*-review article*

Battié MC, Videman T, Kaprio J, Gibbons LE, Gill K, Manninen H, Saarela J & Peltonen L (2009) The Twin Spine Study: Contributions to a changing view of disc degeneration. *Spine J* 9(1): 47-59.

*-review article*

Behrens A, Haigh J, Mechta-Grigoriou F, Nagy A, Yaniv M & Wagner EF (2003) Impaired intervertebral disc formation in the absence of Jun. *Development* 130(1): 103-109.

*-no genetic variant described, no relevant outcome, no MRI*

Bei T, Tilkeridis C, Garatziotis S, Kortetas E & Stratakis C (2002) COL1A1 polymorphism (a four-base pair insertion polymorphism in 3'UTR) in young male Greek army recruits with lumbar disk disease. *Am J Hum Genet* (71)(4, Suppl. S): 1739.

*-no MRI, only abstract, nro of study subjects is unclear*



Bell N, Morrison N, Nguyen T, Eisman J & Hollis B (2001) ApaI polymorphisms of the vitamin D receptor predict bone density of the lumbar spine and not racial difference in bone density in young men. *J Lab Clin Med* 137(2): 133-140.

*-not a relevant outcome*

Bollettino A, Buzas B, Atlas S, Wu T, Belfer I, Hipp H, McKnight C, Scully M, Kingman A, Keller R, Goldman D & Max M (2005) Association of interleukin-10 and interleukin-13 gene polymorphisms with persistent sciatica following lumbar discectomy. *J Pain* 6(8): 559.

*-not a relevant outcome*

Burkemper K & Garris D (2006) Influences of obese (ob/ob) and diabetes (db/db) genotype mutations on lumbar vertebral radiological and morphometric indices: Skeletal deformation associated with dysregulated systemic glucometabolism. *BMC Musc Disord* (7): 10

*-not a relevant outcome, no MRI*

Buttle DJ (2007) Factors controlling matrix turnover in health and disease. *Biochem Soc Trans* 35(4): 643-646.

*-review article*

Chan D, Song Y, Sham P & Cheung KMC (2006) Genetics of disc degeneration. *Eur Spine J* 15 (Suppl 3): S317-25.

*-review article*

Cheung KMC & Al Ghazi S (2008) (i) Current understanding of low back pain and intervertebral disc degeneration: epidemiological perspectives and phenotypes for genetic studies. *Curr Orthopaed* 22(4): 237-244.

*-review article*

Cheung KMC, Karppinen J, Chan D, Ho DWH, Song Y, Sham P, Cheah KSE, Leong JCY & Luk KDK (2009) Prevalence and Pattern of Lumbar Magnetic Resonance Imaging Changes in a Population Study of One Thousand Forty-Three Individuals. *Spine* 34(9): 934-940.

*-no genetic variant described*

Colombini A, Lombardi G, Corsi MM & Banfi G (2008) Pathophysiology of the human intervertebral disc. *Int J Biochem Cell B* 40(5): 837-842.

*-review article*

Eisenstein S & Roberts S (2003) The physiology of the disc and its clinical relevance. *J Bone Joint Surg Br* 85B(5): 633-636.

*-review article*

Eun I, Park WW, Suh KT, Il Kim J & Lee JS (2009) Association between osteoprotegerin gene polymorphism and bone mineral density in patients with adolescent idiopathic scoliosis. *Eur Spine J* 18(12): 1936-1940.

*-not a relevant outcome*

Eyre DR, Matsui Y & Wu J- (2002) Collagen polymorphisms of the intervertebral disc. *Biochem Soc Trans* 30(6): 844-848.

*-review article*

Fink JK (2006) Genetics of common neurologic diseases. *Semin Neurol* 26(5): 463.

*-review article*

Freemont AJ (2009) The cellular pathobiology of the degenerate intervertebral disc and discogenic back pain. *Rheumatology* 48(1): 5-10.

*-review article*

Gruber HE, Hoelscher G, Ingram JA, Chow Y, Loeffler B & Hanley EN (2008) 1,25(OH)<sub>2</sub>-vitamin D<sub>3</sub> inhibits and angiogenin by human annulus cells in vitro. *Spine (Phila Pa 1976)* 33(7): 755-765.

*-no genetic variant described*

Gruber HE, Ingram JA, Hoelscher GL, Zinchenko N, Hanley EN, Jr & Sun Y (2009) Asporin, a susceptibility gene in osteoarthritis, is expressed at higher levels in the more degenerate human intervertebral disc. *Arthritis Res Ther* 11(2): R47.

*-no genetic variant described*

Hipp H, Scully M, Belfer I, Atlas S, Wu T, Buzas B, McKnight C, Bollettino A, Kingman A, Keller R, Goldman D & Max M (2005) Association of interleukin-1 beta polymorphisms with persistent sciatica following lumbar discectomy. *J Pain* 6(8): 559.

*-MRI has not been mentioned, phenotype definition is unclear*

Jones G, White C, Sambrook P & Eisman J (1998) Allelic variation in the vitamin D receptor, lifestyle factors and lumbar spinal degenerative disease. *Ann Rheum Dis* 57(2): 94-99.

*-no MRI, only radiographs*

Jordan K, Syddall H, Dennison E, Cooper C & Arden N (2005) Birthweight, vitamin D receptor gene polymorphism, and risk of lumbar spine osteoarthritis. *J Rheumatol* 32 (4): 678-683.

*-no MRI, only radiographs*

Kalichman L & Hunter DJ (2008) The genetics of intervertebral disc degeneration. Associated genes. *Joint Bone Spine* 75(4): 388-396.

*-review article*

Kawaguchi Y, Furushima K, Sugimori K, Inoue I & Kimura T (2003) Association between polymorphism of the transforming growth factor-beta 1 gene with the radiologic characteristic and ossification of the posterior longitudinal ligament. *Spine (Phila Pa 1976)* 28 (13): 1424-1426.

*-not a relevant outcome*

Kim J, Ku S, Lim K, Jee B, Suh C, Kim S, Choi Y & Moon S (2005) Cytokine production by whole blood cells: Relationship to interleukin gene polymorphism and bone mass. *J Korean Med Sci* 20(6): 1017-1022.

*-not a relevant outcome*

Knoeringer M, Reinke A, Trappe A & Schlegel J (2008) Absence of the mutated Trp2 allele but a common polymorphism of the COL9A2 collagen gene is associated with early recurrence after lumbar discectomy in a German population. *Eur Spine J* 17(3): 463-7.

*-not a relevant outcome, success of surgery*

Koshizuka Y, Ogata N, Shiraki M, Hosoi T, Seichi A, Takeshita K, Nakamura K & Kawaguchi H (2006) Distinct association of gene polymorphisms of estrogen receptor and vitamin D receptor with lumbar spondylosis in postmenopausal women. *Eur Spine J* 15(10): 1521-1528.

*-not a relevant outcome, no MRI*

Le Maitre CL, Hoyland JA & Freemont AJ (2007) Interleukin-1 receptor antagonist delivered directly and by gene therapy inhibits matrix degradation in the intact degenerate human intervertebral disc: an in situ zymographic and gene therapy study. *Arth Res Ther* 9(4).

*-no genetic variant described, no relevant outcome of the disease, no MRI, nro of study subjects < 50*

Liu Z, Tang NLS, Cao X-, Liu W-, Qiu X-, Cheng JCY & Qiu Y (2010) Lack of association between the promoter polymorphisms of MMP-3 and IL-6 genes and adolescent idiopathic scoliosis: A case-control study in a Chinese Han population. *Spine (Phila Pa 1976)* 35(18):1701-5.

*-not a relevant outcome*

Matsui Y (2006) Type IX collagen diseases. *Clinical calcium* 16(11): 1894-1898.

*-review article*

Matsui Y, Mirza SK, Wu J-, Carter B, Bellabarba C, Shaffrey CI, Chapman JR & Eyre DR (2004) The association of lumbar spondylolisthesis with collagen IX tryptophan alleles. *J Bone Joint Surg Br* 86(7): 1021-1026.

*-not a relevant outcome, unclear whether MRI has been done or not*

Matsui Y, Wu J-, Weis MA, Pietka T & Eyre DR (2003) Matrix deposition of tryptophan-containing allelic variants of type IX collagen in developing human cartilage. *Matrix Biol* 22(2): 123-129.

*-no MRI*

Min JL, Meulenbelt I, Riyazi N, Kloppenburg M, Houwing-Duistermaat JJ, Seymour AB, van Duijn CM & Slagboom PE (2006) Association of matrilin-3 polymorphisms with spinal disc degeneration and osteoarthritis of the first carpometacarpal joint of the hand. *Ann Rheum Dis* 65(8): 1060-1066.

*-no MRI*

Min JL, Meulenbelt I, Kloppenburg M, van Duijn CM & Slagboom PE (2007) Mutation analysis of candidate genes within the 2q33.3 linkage area for familial early-onset generalised osteoarthritis. *Eur J Hum Genet* 15(7): 791-799.

*-not a relevant outcome, OA*

Modic MT (2007) Degenerative disc disease: genotyping, MR imaging and phenotyping. *Skeletal Radiol* 36(2): 91-3.

*-review article*

Nakki A, Videman T, Kujala UM, Suhonen M, Mannikko M, Peltonen L, Battie MC, Kaprio J & Saarela J (2011) Candidate gene association study of magnetic resonance imaging-based hip osteoarthritis (OA): evidence for COL9A2 gene as a common predisposing factor for hip OA and lumbar disc degeneration. *J Rheumatol* 38(4): 747-752.

*-not a relevant outcome, OA*

Pluijm S, van Essen H, Bravenboer N, Uitterlinden A, Smit J, Pols H & Lips P (2004) Collagen type I alpha 1 Sp1 polymorphism, osteoporosis, and intervertebral disc degeneration in older men and women. *Ann Rheum Dis* 63(1): 71-77.

*-no MRI*

Podichetty VK (2007) The aging spine: The role of inflammatory mediators in intervertebral disc degeneration. *Cell Mol Biol* 53(5): 4-18.

*-review article*

Rannou F, Revel M & Poiraudou S (2003) Is degenerative disk disease genetically determined? *Joint Bone Spine* 70(1): 3-5.

*-review article*

Reimanna F, Cox JJ, Belfer I, Diatchenko L, Zaykin DV, McHale DP, Drenth JPH, Dai F, Wheeler J, Sanders F, Wood L, Wu T-, Karppinen J, Nikolajsen L, Männikkö M, Max MB, Kiselyczny C, Poddar M, Te Morsche RHM, Smith S, Gibson D, Kelempisioti A, Maixner W, Gribble FM & Woods CG (2010) Pain perception is altered by a nucleotide polymorphism in SCN9A. *Proc Natl Acad Sci USA* 107(11): 5148-5153.

*-not a relevant outcome, pain*

Revel M (2006) The concept of discolysis in intervertebral disk disease. *Acta Reumatol Port* 31(2): 133-140.

*-review article*

Ryder JJ, Garrison K, Song F, Hooper L, Skinner J, Loke Y, Loughlin J, Higgins JPT & MacGregor AJ (2008) Genetic associations in peripheral joint osteoarthritis and spinal degenerative disease: a systematic review *Ann Rheum Dis* 67(5): 584-591.

*-review article*

Sakai Y, Matsuyama Y, Hasegawa Y, Yoshihara H, Nakamura H, Katayama Y, Imagama S, Ito Z, Ishiguro N & Hamajima N (2007) Association of gene polymorphisms with intervertebral disc degeneration and vertebral osteophyte formation. *Spine (Phila Pa 1976)* 32(12): 1279-86.

*-no MRI*

Semba K, Araki K, Li Z, Matsumoto K-, Suzuki M, Nakagata N, Takagi K, Takeya M, Yoshinobu K, Araki M, Imai K, Abe K & Yamamura K- (2006) A novel murine gene, Sickie tail, linked to the Danforth's short tail locus, is required for normal development of the intervertebral disc. *Genetics* 172(1): 445-456.

*-no genetic variant described, no MRI, animal study*

Song HF, Wu ZH, Fei Q, Yan JZ, Liu Z, Zhang JG, Li SG & Qiu GX (2010) Association study of Trp2 allele polymorphism with degenerative disc disease in a Chinese Han nationality. *Chung-Hua I Hsueh Tsa Chih* 90(3): 148-152.

*-unclear whether MRI has been done or not, only abstract, in Chinese; translation not available*

Tang Y, Yuan H-, Wang Z-, Xu J- & Lei L (2007) The genetic polymorphisms of MMP-3 and VDR on susceptibility of lumbar disc degeneration. *Fudan University Journal of Medical Sciences* 34(1): 37-41.

*-only abstract, in Chinese; translation not available*

Tegeder I (2009) Current evidence for a modulation of low back pain by human genetic variants. *J Cell Mol Med* 13(8): 1605-1619.

*-review article*

Tilkeridis C, Bei T, Garantziotis S & Stratakis CA (2005) Association of a COL1A1 polymorphism with lumbar disc disease in young military recruits. *J Med Genet.* 42(7).

*-number of study subjects under 50, no MRI*

Urano T, Narusawa K, Kobayashi S, Shiraki M, Horie-Inoue K, Sasaki N, Hosoi T, Ouchi Y, Nakamura T & Inoue S (2010) Association of HTRA1 promoter polymorphism with spinal disc degeneration in Japanese women. *J Bone Miner Metab* 28(2): 220-6.

*-no MRI*

Urano T, Narusawa K, Shiraki M, Sasaki N, Hosoi T, Ouchi Y, Nakamura T & Inoue S (2011) Single-nucleotide polymorphism in the hyaluronan and proteoglycan link protein 1 (HAPLN1) gene is associated with spinal osteophyte formation and disc degeneration in Japanese women. *Eur Spine J* 20(4): 572-577.

*-no MRI*

Urano T, Narusawa K, Shiraki M, Usui T, Sasaki N, Hosoi T, Ouchi Y, Nakamura T & Inoue S (2007) Association of a single nucleotide polymorphism in the WISP1 gene with spinal osteoarthritis in postmenopausal Japanese women. *J Bone Miner Metab* 25(4): 253-8.

*-no MRI*

Urano T, Narusawa K, Shiraki M, Usui T, Sasaki N, Hosoi T, Ouchi Y, Nakamura T & Inoue S (2008) Association of a single nucleotide polymorphism in the insulin-like growth factor-1 receptor gene with spinal disc degeneration in postmenopausal Japanese women. *Spine (Phila Pa 1976)* 33(11): 1256-61.

*-no MRI*

Urano T, Shiraki M, Narusawa K, Usui T, Sasaki N, Hosoi T, Ouchi Y, Nakamura T & Inoue S (2007) Q89R polymorphism in the LDL receptor-related protein 5 gene is associated with spinal osteoarthritis in postmenopausal Japanese women. *Spine (Phila Pa 1976)* 32(1): 25-9.

*-no MRI*

Urano T, Usui T, Shiraki M, Ouchi Y & Inoue S (2009) Association of a single nucleotide polymorphism in the constitutive androstane receptor gene with bone mineral density. *Geriatr Gerontol Int* 9(3): 235-241.

*-not a relevant outcome*

Valdes AM, Hassett G, Hart DJ & Spector TD (2005) Radiographic progression of lumbar spine disc degeneration is influenced by variation at inflammatory genes: a candidate SNP association study in the Chingford cohort. *Spine (Phila Pa 1976)* 30(21): 2445-51

*-no MRI*

Videman T & Battié MC (2002) Point of view. *Spine* 27(1): 82-83.

*-commentary*

Virtanen IM, Karppinen J, Taimela S, Ott J, Barral S, Kaikkonen K, Heikkila O, Mutanen P, Noponen N, Mannikko M, Tervonen O, Natri A & Ala-Kokko L (2007) Occupational and genetic risk factors associated with intervertebral disc disease. *Spine (Phila Pa 1976)* 32(10): 1129-34.

*-no MRI*

Wang ZC, Chen XS, Wang da W, Shi JG, Jia LS, Xu GH, Huang JH & Fan L (2010) The genetic association of vitamin D receptor polymorphisms and cervical spondylotic myelopathy in Chinese subjects. *Clin Chim Acta* 411(11-12): 794-797.

*-not a relevant outcome*

Williams FMK, Manek NJ, Sambrook PN, Spector TD & Macgregor AJ (2007) Schmorl's nodes: Common, highly heritable, and related to lumbar disc disease. *Arthritis Rheum* 57(5): 855-860.

*-no specific genetic variant reported*

Wrocklage C, Wassmann H & Paulus W (2000) COL9A2 allelotypes in intervertebral disc disease. *Biochem Biophys Res Commun* 279(2): 398-400.

*-unclear whether MRI has been done or not*

Yamada Y (2000) Association of a Leu(10)-> Pro polymorphism of the transforming growth factor-beta 1 with genetic susceptibility to osteoporosis and spinal osteoarthritis. *Mech Ageing Dev* 116(2-3): 113-123.

*-review article*

Yamada Y, Okuizumi H, Miyauchi A, Takagi Y, Ikeda K & Harada A (2000) Association of transforming growth factor beta 1 genotype with spinal osteophytosis in Japanese women. *Arthritis Rheum* 43(2): 452-460.

*-no MRI for all, very small study*

Ye W, Ma RF, Su PQ, Huang DS, Liu SL, Chen WJ & Wang XG (2007a) Association of single nucleotide polymorphisms of IL-1b with lumbar disc disease. *Yi chuan = Hereditas / Zhongguo yi chuan xue hui bian ji* 29(8): 923-928.

*-only abstract, in Chinese; translation not available*

Ye W, Huang D, Chen W, Li C, Peng Y, Liang A & Liu S (2007b) [Association of 86 bp variable number tandem repeat polymorphism of interleukin-1 receptor antagonist gene with lumbar disc disease]. *Nan Fang Yi Ke Da Xue Xue Bao* 27(10): 1485-8.

*-only abstract, in Chinese; translation not available*

Yuan H- & Lei L (2007) Current research in candidate genes of lumbar disc degeneration. *Fudan University Journal of Medical Sciences* 34(3).

*-only abstract, in Chinese; translation not available, likely a review article*

Yuan H-, Tang Y, Liang Y-, Lei L, Xiao G-, Wang S & Xia Z- (2010) Matrix metalloproteinase-3 and vitamin D receptor genetic polymorphisms, and their interactions with occupational exposure in lumbar disc degeneration. *J Occup Health* 52(1): 23-30.

*-no MRI*

## **References of Appendix S1**

1. Ioannidis JP, Boffetta P, Little J, et al. Assessment of cumulative evidence on genetic associations: Interim guidelines. *Int J Epidemiol.* 2008;37(1):120-132.
2. Lage K, Karlberg EO, Stirling ZM, et al. A human phenome-interactome network of protein complexes implicated in genetic disorders. *Nat Biotechnol.* 2007;25(3):309-316.
3. Jensen LJ, Kuhn M, Stark M, et al. STRING 8--a global view on proteins and their functional interactions in 630 organisms. *Nucleic Acids Res.* 2009;37:412-416.
4. Zanzoni A, Montecchi-Palazzi L, Quondam M, Ausiello G, Helmer-Citterich M, Cesareni G. MINT: A molecular INTERaction database. *FEBS Lett.* 2002;513(1):135-140.
5. Bader GD, Betel D, Hogue CWV. BIND: The biomolecular interaction network database. *Nucleic Acids Res.* 2003;31(1):248-250.
6. Xenarios I, Salwinski L, Duan XJ, Higney P, Kim S, Eisenberg D. DIP, the database of interacting proteins: A research tool for studying cellular networks of protein interactions. *Nucleic Acids Res.* 2002;30(1):303-305.
7. Breitkreutz B, Stark C, Tyers M. The GRID: The general repository for interaction datasets. *Genome Biol.* 2003;4(3).
8. Keshava Prasad TS, Goel R, Kandasamy K, et al. Human protein reference database--2009 update. *Nucleic Acids Res.* 2009;37:767-772.
9. Kanehisa M, Goto S, Furumichi M, Tanabe M, Hirakawa M. KEGG for representation and analysis of molecular networks involving diseases and drugs. *Nucleic Acids Res.* 2010;38:355-360.
10. Joshi-Tope G, Gillespie M, Vastrik I, et al. Reactome: A knowledgebase of biological pathways. *Nucleic Acids Res.* 2005;33:428-432.
11. Aranda B, Achuthan P, Alam-Faruque Y, et al. The IntAct molecular interaction database in 2010. *Nucleic Acids Res.* 2010;38:525-531.
12. den Dunnen JT, Antonarakis SE. Mutation nomenclature extensions and suggestions to describe complex mutations: A discussion. *Hum Mutat.* 2000;15(1):7-12.
13. Pereira FA, Pinheiro dS, Rodart IF, Carmo T, Mauadie Azevedo, Lemaire DC, Reis MG. Association of TGF-beta1 codon 25 (G915C) polymorphism with hepatitis C virus infection. *J Med Virol.* 2008;80(1):58-64.
14. Ju W, Kang S, Kim JW, et al. Promoter polymorphism in the matrix metalloproteinase-1 and risk of cervical cancer in Korean women. *Cancer Lett.* 2005;217(2):191-196.
15. Zhai Y, Qiu W, Dong X, et al. Functional polymorphisms in the promoters of MMP-1, MMP-2, MMP-3, MMP-9, MMP-12 and MMP-13 are not associated with hepatocellular carcinoma risk. *Gut.* 2007;56(3):445-447.
16. Demacq C, Vasconcellos VB, Marcaccini AM, Gerlach RF, Machado AA, Tanus-Santos JE. A genetic polymorphism of matrix metalloproteinase 9 (MMP-9) affects the changes in circulating MMP-9 levels induced by highly active antiretroviral therapy in HIV patients. *Pharmacogenomics J.* 2009;9(4):265-273.
17. Tsironi EE, Pefkianaki M, Tsezou A, et al. Evaluation of MMP1 and MMP3 gene polymorphisms in exfoliation syndrome and exfoliation glaucoma. *Mol Vis.* 2009;15:2890-2895.
18. Demacq C, Vasconcellos VB, Izidoro-Toledo TC, et al. Vascular endothelial growth factor (VEGF) and endothelial nitric oxide synthase (NOS3) polymorphisms are associated with high relapse risk in childhood acute lymphoblastic leukemia (ALL). *Clin Chim Acta.* 2010;411(17-18):1335-1340.
19. Hu Z, Li C, Chen K, et al. Single nucleotide polymorphisms in selected apoptotic genes and BPDE-induced apoptotic capacity in apparently normal primary lymphocytes: A genotype-phenotype correlation analysis. *J Cancer Epidemiol.* 2008;2008:147905-147905.
